# Supplementary material for: Milk microbiome transplantation: recolonizing donor milk with mother's own milk microbiota
Source: PubMed Central journal article supplement (PMC10776751; doi:10.1007/s00253-023-12965-8), 2024-01-09
Supplement: 253_2023_12965_MOESM1_ESM.pdf [file 253_2023_12965_MOESM1_ESM.pdf]

## Supplementary data

Journal: Applied Microbiology and Biotechnology

### **Milk Microbiome Transplantation: Recolonizing Donor Milk with Mother's Own Milk Microbiota**

Lisa F. Stinson<sup>1\*</sup>, Jie Ma<sup>1</sup>, Ching Tat Lai<sup>1</sup>, Alethea Rea<sup>2</sup>, Sharon L. Perrella<sup>1</sup>, and Donna T. Geddes<sup>1</sup>

<sup>1</sup> School of Molecular Sciences, The University of Western Australia, Perth, Australia

<sup>2</sup> Mathematics and Statistics, Murdoch University, Perth, Australia

\* Corresponding author

[lisa.stinson@uwa.edu.au](mailto:lisa.stinson@uwa.edu.au)

+6148 6488 3200



|                                          |   |      |    |     |    |    |   |    |    |      |    |    |    |   |
|------------------------------------------|---|------|----|-----|----|----|---|----|----|------|----|----|----|---|
| <i>Pseudomonas</i>                       | 3 | 0    | 17 | 0   | 8  | 7  | 0 | 2  | 5  | 24   | 7  | 3  | 4  | 0 |
| <i>Ralstonia</i>                         | 0 | 37   | 1  | 0   | 0  | 0  | 0 | 0  | 0  | 0    | 0  | 0  | 0  | 0 |
| <i>Serratia</i>                          | 0 | 0    | 1  | 0   | 0  | 0  | 0 | 0  | 0  | 0    | 0  | 0  | 0  | 0 |
| <i>Skermanella</i>                       | 0 | 0    | 0  | 0   | 0  | 0  | 0 | 0  | 0  | 1    | 0  | 0  | 0  | 0 |
| SN8                                      | 0 | 1    | 0  | 2   | 1  | 0  | 0 | 0  | 0  | 0    | 0  | 0  | 1  | 0 |
| <i>Sphingomonas</i>                      | 0 | 1    | 0  | 0   | 0  | 0  | 0 | 0  | 0  | 0    | 0  | 0  | 0  | 0 |
| <i>Staphylococcus</i>                    | 0 | 302  | 86 | 92  | 17 | 17 | 0 | 32 | 41 | 110  | 25 | 42 | 39 | 3 |
| <i>Stenotrophomonas</i>                  | 0 | 124  | 14 | 2   | 6  | 5  | 0 | 1  | 0  | 17   | 15 | 22 | 0  | 0 |
| <i>Streptococcus</i>                     | 0 | 380  | 19 | 3   | 1  | 1  | 0 | 1  | 1  | 62   | 16 | 0  | 0  | 0 |
| <i>Thermoactinomyces</i>                 | 0 | 0    | 0  | 213 | 0  | 0  | 0 | 0  | 0  | 0    | 0  | 0  | 0  | 0 |
| Unclassified <i>Bacillaceae</i>          | 0 | 2    | 0  | 1   | 2  | 0  | 0 | 1  | 1  | 6    | 1  | 1  | 1  | 0 |
| Unclassified <i>Comamonadaceae</i>       | 0 | 6194 | 17 | 0   | 0  | 0  | 0 | 0  | 0  | 0    | 0  | 2  | 0  | 0 |
| Unclassified <i>Enterobacteriaceae</i>   | 1 | 0    | 3  | 0   | 2  | 2  | 0 | 7  | 3  | 13   | 1  | 0  | 3  | 0 |
| Unclassified <i>Erwiniaceae</i>          | 0 | 0    | 0  | 0   | 0  | 1  | 0 | 0  | 0  | 0    | 0  | 0  | 0  | 0 |
| Unclassified <i>Micrococcaceae</i>       | 0 | 0    | 0  | 1   | 0  | 0  | 0 | 0  | 0  | 0    | 0  | 0  | 0  | 0 |
| Unclassified <i>Moraxellaceae</i>        | 0 | 0    | 1  | 0   | 0  | 1  | 0 | 0  | 1  | 0    | 0  | 1  | 1  | 0 |
| Unclassified <i>Propionibacteriaceae</i> | 0 | 0    | 0  | 0   | 0  | 0  | 0 | 0  | 0  | 1107 | 0  | 0  | 0  | 0 |
| Unclassified <i>Pseudomonadaceae</i>     | 0 | 0    | 1  | 1   | 1  | 2  | 0 | 0  | 0  | 0    | 3  | 0  | 1  | 0 |
| Unclassified <i>Rhizobiaceae</i>         | 0 | 0    | 0  | 0   | 0  | 0  | 0 | 0  | 0  | 1    | 0  | 0  | 0  | 0 |
| Unclassified <i>Staphylococcaceae</i>    | 0 | 0    | 0  | 0   | 0  | 0  | 0 | 0  | 0  | 1    | 0  | 1  | 0  | 0 |
| Unclassified <i>Streptococcaceae</i>     | 0 | 0    | 0  | 0   | 0  | 1  | 0 | 0  | 0  | 0    | 0  | 0  | 0  | 0 |
| Unclassified <i>Weeksellaceae</i>        | 0 | 0    | 0  | 1   | 0  | 1  | 0 | 0  | 0  | 1    | 0  | 0  | 0  | 0 |
| Unclassified <i>Xanthobacteraceae</i>    | 0 | 0    | 0  | 0   | 0  | 0  | 0 | 0  | 0  | 0    | 0  | 0  | 1  | 0 |
| Unclassified <i>Xanthomonadaceae</i>     | 0 | 0    | 0  | 0   | 0  | 0  | 0 | 0  | 0  | 0    | 1  | 0  | 0  | 0 |
| <i>Yokenella</i>                         | 0 | 0    | 0  | 0   | 0  | 0  | 0 | 0  | 0  | 2    | 0  | 0  | 0  | 0 |

**Supplementary Table 2:** Comparison of bacterial titers in recolonized Holder pasteurized and recolonized UV-C treated milk samples. Data are P values derived from Wilcoxon signed-rank test. \* Denotes significant P values.

| % Inoculation | Time | MSA     | Nutrient agar | MRS     | Wilkins Chalgren |
|---------------|------|---------|---------------|---------|------------------|
| 5%            | T0   | 0.44    | 0.085         | 0.20    | 0.27             |
|               | T4   | 0.025 * | 0.12          | 0.58    | 0.94             |
|               | T8   | 0.16    | 0.30          | 0.11    | 0.098            |
| 10%           | T0   | 0.94    | 0.61          | 0.89    | 0.028 *          |
|               | T4   | 0.013 * | 0.83          | 0.58    | 0.14             |
|               | T8   | 0.074   | 0.57          | 0.17    | 0.20             |
| 30%           | T0   | 1       | 0.83          | 0.60    | 0.050            |
|               | T4   | 0.098   | 0.41          | 0.29    | 0.13             |
|               | T8   | 0.055   | 0.21          | 0.036 * | 0.027 *          |

**Supplementary Table 3:** Comparison of bacterial titers in fresh (T0) MOM and recolonized milk samples. Data are P values derived from Wilcoxon signed-rank test. \* Denotes significant P values.

| Pasteurization method | % Inoculation | Time | MSA      | Nutrient agar | MRS     | Wilkins Chalgren |
|-----------------------|---------------|------|----------|---------------|---------|------------------|
| UV                    | 5%            | T0   | 0.0039 * | 0.0039 *      | 0.023 * | 0.0039 *         |
|                       |               | T4   | 0.0039 * | 0.0091 *      | 0.023 * | 0.0039 *         |
|                       |               | T8   | 0.36     | 1             | 0.052   | 0.82             |
|                       | 10%           | T0   | 0.014 *  | 0.0039 *      | 0.022 * | 0.0039 *         |
|                       |               | T4   | 0.014 *  | 0.16          | 0.022 * | 0.13             |
|                       |               | T8   | 0.57     | 0.73          | 0.023 * | 1                |
|                       | 30%           | T0   | 0.0039 * | 0.0039 *      | 0.076   | 0.0039 *         |
|                       |               | T4   | 0.19     | 0.30          | 0.074   | 0.34             |
|                       |               | T8   | 0.20     | 0.20          | 0.17    | 0.25             |
| HP                    | 5%            | T0   | 0.0039 * | 0.0091 *      | 0.022 * | 0.0039 *         |
|                       |               | T4   | 0.0039 * | 0.098         | 0.022 * | 0.13             |
|                       |               | T8   | 0.91     | 0.91          | 0.93    | 1                |
|                       | 10%           | T0   | 0.0039 * | 0.0039 *      | 0.022 * | 0.0039 *         |
|                       |               | T4   | 0.014 *  | 0.13          | 0.023 * | 0.13             |
|                       |               | T8   | 0.30     | 0.65          | 0.93    | 0.65             |
|                       | 30%           | T0   | 0.0039 * | 0.0039 *      | 0.023 * | 0.0090 *         |
|                       |               | T4   | 0.73     | 0.48          | 0.21    | 0.77             |
|                       |               | T8   | 0.0091 * | 0.055         | 0.014 * | 0.0039 *         |

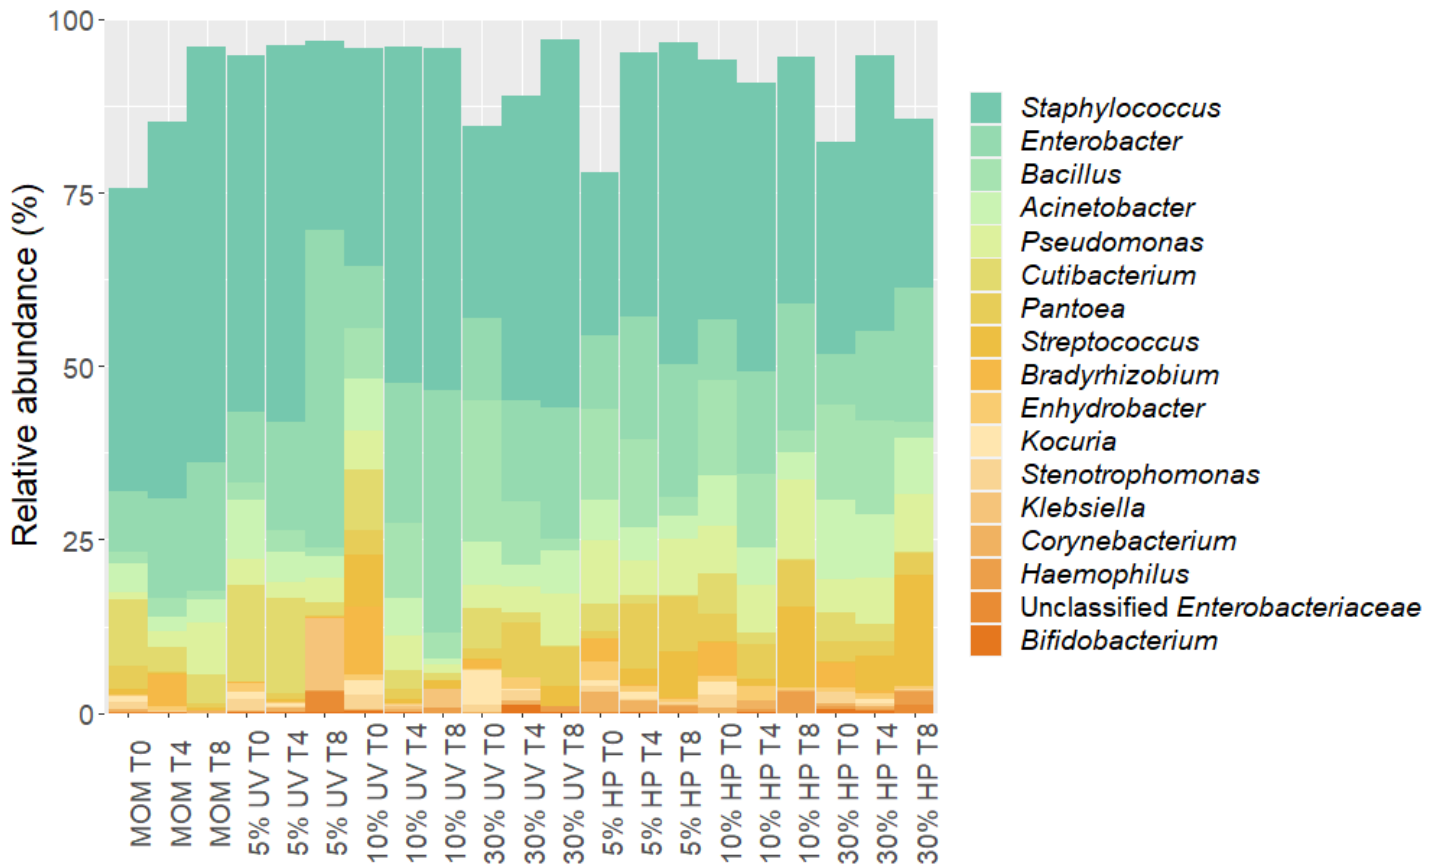

**Supplementary Figure 1:** Mean relative abundance the major viable genera (>0.05% relative abundance) across each sample type. MOM: mother's own milk. T0: baseline. T4: 4 hours. T8: 8 hours.
